# Supplementary material for: Novel necroptosis-related gene signature for predicting the prognosis of pancreatic adenocarcinoma
Source: publisher site journal article supplement (doi:10.18632/aging.203846), 2022-01-24
Supplement: Supplementary file [file aging-v14i2-203846-supplementary-material-SD1.pdf]

## SUPPLEMENTARY TABLES

**Supplementary Table 1. 52 necroptosis-related genes.**

|        |        |       |       |        |
|--------|--------|-------|-------|--------|
| BAK1   | CHMP4B | IL18  | CASP9 | NLRP6  |
| BAX    | CHMP4C | IL1A  | GPX4  | NLRP7  |
| CASP1  | CHMP6  | IL1B  | GSDMA | NOD1   |
| CASP3  | CHMP7  | IRF1  | GSDMB | NOD2   |
| CASP4  | CYCS   | IRF2  | GSDMC | PJVK   |
| CASP5  | ELANE  | TP53  | IL6   | PLCG1  |
| CHMP2A | GSDMD  | TP63  | NLRC4 | PRKACA |
| CHMP2B | GSDME  | AIM2  | NLRP1 | PYCARD |
| CHMP3  | GZMB   | CASP6 | NLRP2 | SCAF11 |
| CHMP4A | HMGB1  | CASP8 | NLRP3 | TIRAP  |
| TNF    | GZMA   |       |       |        |

**Supplementary Table 2. 25 DEGs linked to NRGs.**

| gene         | conMean     | treatMean   | logFC        | p Value     |
|--------------|-------------|-------------|--------------|-------------|
| TNF          | 2.9597148   | 0.878954778 | -1.751597318 | 0.023229673 |
| CYBB         | 44.8476025  | 13.38835502 | -1.74405215  | 0.004999667 |
| SLC25A6      | 260.2667    | 212.1314808 | -0.295032001 | 0.029730049 |
| PYGB         | 26.3985825  | 75.0233836  | 1.506879866  | 0.002884394 |
| PLA2G4C      | 3.36357325  | 1.527573251 | -1.138753114 | 0.007311847 |
| PLA2G4F      | 0.096944548 | 0.69805447  | 2.848107951  | 0.01144699  |
| CAPN2        | 29.2810825  | 50.60433046 | 0.789291959  | 0.012420784 |
| NLRP3        | 2.307436    | 1.149735351 | -1.004988816 | 0.014207465 |
| RNF103-CHMP3 | 0.03308378  | 0.125159531 | 1.919572176  | 0.049686083 |
| CHMP4C       | 7.25279525  | 14.30096114 | 0.979503084  | 0.038630253 |
| FASLG        | 1.15240325  | 0.348416184 | -1.725762088 | 0.037736936 |
| IFNA2        | 0.012599015 | 0.001135769 | -3.471569966 | 0.000288726 |
| IFNA6        | 0.021787193 | 0.001020912 | -4.415549216 | 0.000203649 |
| IFNA13       | 0.00733201  | 0.001187969 | -2.625711059 | 0.001901453 |
| IFNGR1       | 67.564385   | 40.74547212 | -0.729623216 | 0.009433631 |
| JAK1         | 49.8170925  | 34.40897001 | -0.533856116 | 0.044375834 |
| JAK3         | 12.6223675  | 4.252687198 | -1.569535885 | 0.019953735 |
| TYK2         | 19.87963    | 12.60590665 | -0.657191021 | 0.048594059 |
| STAT4        | 3.619687    | 1.434699334 | -1.335116524 | 0.03600294  |
| STAT5A       | 14.5681125  | 9.021417197 | -0.691387976 | 0.017539418 |
| TLR4         | 7.0368955   | 3.415832457 | -1.042701875 | 0.021537533 |
| TNFAIP3      | 30.580245   | 13.05847187 | -1.227613886 | 0.002033049 |
| H2AW         | 3.70185     | 10.68664761 | 1.529491009  | 0.024420867 |
| H2AC6        | 10.024392   | 27.38610677 | 1.449929449  | 0.015385115 |
| BCL2         | 7.155259    | 2.040894169 | -1.809802617 | 0.014983353 |

**Supplementary Table 3. Hub genes.**

| Name      | Betweenness | Closeness   | Degree | Network     |
|-----------|-------------|-------------|--------|-------------|
| JAK1      | 58.62251082 | 0.296875    | 11     | 9.223809524 |
| TNF       | 30.05974026 | 0.287878788 | 11     | 9.555555556 |
| JAK3      | 42.26688312 | 0.292307692 | 10     | 8.103174603 |
| IFNGR1    | 20.94393939 | 0.28358209  | 10     | 8.158730159 |
| TLR4      | 32.18744589 | 0.28358209  | 10     | 8.357142857 |
| TYK2      | 13.49307359 | 0.28358209  | 10     | 8.583333333 |
| STAT4     | 5.093073593 | 0.275362319 | 8      | 6.726190476 |
| STAT5A    | 13.33333333 | 0.271428571 | 7      | 5.833333333 |
| IFNA2     | 0.6         | 0.263888889 | 6      | 5.8         |
| IFNA6     | 0           | 0.256756757 | 5      | 5           |
| TNFAIP3   | 1.533333333 | 0.25        | 5      | 4.166666667 |
| CYBB      | 1.2         | 0.25        | 4      | 3.333333333 |
| NLRP3     | 0.666666667 | 0.243589744 | 4      | 3.333333333 |
| BCL2      | 60          | 0.253333333 | 3      | 1           |
| IFNA13    | 0           | 0.246753247 | 3      | 3           |
| HIST1H2AC | 32          | 0.213483146 | 2      | 0           |
| FASLG     | 0           | 0.234567901 | 2      | 2           |
| CHMP3     | 0           | 0.052631579 | 1      | 0           |
| CHMP4C    | 0           | 0.052631579 | 1      | 0           |
| HIST3H2A  | 0           | 0.180952381 | 1      | 0           |

**Supplementary Table 4. 14 risk PRGs.**

| Id        | TCGA-3A-A9J0 | TCGA-2L-AAQL | TCGA-US-A77E | TCGA-RB-AA9M |
|-----------|--------------|--------------|--------------|--------------|
| MET       | 5.042611     | 4.7215981    | 5.9641271    | 5.2955498    |
| FAM25C    | 2.0205815    | 2.2528105    | 2.0205815    | 2.0205815    |
| CASKIN2   | 4.1749081    | 3.58593      | 4.0714195    | 4.1428019    |
| TLE2      | 4.1259097    | 4.624045     | 3.999072     | 4.7286858    |
| USP20     | 3.0161423    | 3.715024     | 3.7000295    | 3.641327     |
| MROH9     | 1.0486983    | 0.9140702    | 0.9140702    | 0.9350862    |
| SPRN      | 2.6244162    | 2.8517601    | 2.3841645    | 2.6025939    |
| MYEOV     | 3.2386553    | 4.1509198    | 4.4052511    | 3.667548     |
| ARSG      | 2.2785722    | 2.0642247    | 2.3422646    | 2.3341557    |
| FAM111B   | 2.6997762    | 1.4177758    | 1.9956956    | 2.4969894    |
| MIR98     | 0.8402696    | 1.218496     | 1.1183522    | 0.8402696    |
| MIR106B   | 2.7306465    | 1.4784037    | 1.4784037    | 2.6675028    |
| LY6D      | 1.9197985    | 2.4401492    | 2.8759444    | 5.8630146    |
| PPP2R3A   | 2.3522622    | 2.2616753    | 2.9258627    | 3.446074     |
| riskScore | -0.847267824 | -0.659885519 | -0.580465013 | -0.643074732 |
| risk      | low          | low          | low          | low          |

**Supplementary Table 5A. GO enrichment analysis.**

| <b>Ontology</b> | <b>Description</b>                                               | <b>BgRatio</b> | <b>p value</b> | <b>q value</b> |
|-----------------|------------------------------------------------------------------|----------------|----------------|----------------|
| BP              | skin development                                                 | 415/18862      | 1.49E-11       | 2.35E-08       |
| BP              | epidermis development                                            | 463/18862      | 8.27E-11       | 6.50E-08       |
| BP              | hemidesmosome assembly                                           | 12/18862       | 1.91E-09       | 9.99E-07       |
| BP              | keratinocyte differentiation                                     | 302/18862      | 2.51E-07       | 9.88E-05       |
| BP              | cell-substrate junction assembly                                 | 100/18862      | 5.77E-07       | 0.000181471    |
| BP              | cell-substrate junction organization                             | 106/18862      | 8.58E-07       | 0.00021942     |
| BP              | cornification                                                    | 113/18862      | 1.32E-06       | 0.00021942     |
| BP              | cell adhesion mediated by integrin                               | 72/18862       | 1.38E-06       | 0.00021942     |
| BP              | epidermal cell differentiation                                   | 360/18862      | 1.42E-06       | 0.00021942     |
| BP              | formation of primary germ layer                                  | 115/18862      | 1.49E-06       | 0.00021942     |
| BP              | keratinization                                                   | 225/18862      | 1.53E-06       | 0.00021942     |
| BP              | cell-matrix adhesion                                             | 230/18862      | 1.84E-06       | 0.000241166    |
| BP              | gastrulation                                                     | 179/18862      | 2.66E-06       | 0.000321238    |
| BP              | extracellular matrix organization                                | 393/18862      | 3.31E-06       | 0.000350118    |
| BP              | extracellular structure organization                             | 394/18862      | 3.39E-06       | 0.000350118    |
| BP              | external encapsulating structure organization                    | 396/18862      | 3.56E-06       | 0.000350118    |
| BP              | cell-substrate adhesion                                          | 359/18862      | 9.94E-06       | 0.000919336    |
| BP              | mesodermal cell differentiation                                  | 32/18862       | 1.72E-05       | 0.001499725    |
| BP              | mesoderm formation                                               | 68/18862       | 2.02E-05       | 0.001674835    |
| BP              | mesoderm morphogenesis                                           | 70/18862       | 2.33E-05       | 0.001833235    |
| BP              | positive regulation of chemotaxis                                | 139/18862      | 6.09E-05       | 0.004395847    |
| BP              | epithelial cell migration                                        | 357/18862      | 6.15E-05       | 0.004395847    |
| BP              | epithelium migration                                             | 360/18862      | 6.56E-05       | 0.004483738    |
| BP              | negative regulation of anoikis                                   | 17/18862       | 7.27E-05       | 0.004584778    |
| BP              | tissue migration                                                 | 365/18862      | 7.29E-05       | 0.004584778    |
| BP              | keratinocyte proliferation                                       | 48/18862       | 8.75E-05       | 0.005293053    |
| BP              | ameboidal-type cell migration                                    | 473/18862      | 0.000102639    | 0.005822652    |
| BP              | entry into host                                                  | 153/18862      | 0.00010367     | 0.005822652    |
| BP              | integrin-mediated signaling pathway                              | 106/18862      | 0.000170071    | 0.009222742    |
| BP              | response to prostaglandin E                                      | 23/18862       | 0.000185292    | 0.009713186    |
| BP              | establishment of skin barrier                                    | 24/18862       | 0.000211015    | 0.010283511    |
| BP              | regulation of anoikis                                            | 24/18862       | 0.000211015    | 0.010283511    |
| BP              | movement in host environment                                     | 175/18862      | 0.000215789    | 0.010283511    |
| BP              | cell junction assembly                                           | 425/18862      | 0.00022915     | 0.010599087    |
| BP              | regulation of water loss via skin                                | 26/18862       | 0.00026916     | 0.012093978    |
| BP              | positive regulation of cell projection organization              | 344/18862      | 0.000277513    | 0.012122947    |
| BP              | positive regulation of granulocyte chemotaxis                    | 27/18862       | 0.000301738    | 0.012824934    |
| BP              | mesoderm development                                             | 123/18862      | 0.0003398      | 0.014062637    |
| BP              | response to prostaglandin                                        | 30/18862       | 0.000414413    | 0.016710737    |
| BP              | anoikis                                                          | 34/18862       | 0.000602246    | 0.023677781    |
| BP              | biological process involved in interaction with host             | 219/18862      | 0.000710972    | 0.027270667    |
| BP              | cell chemotaxis                                                  | 306/18862      | 0.000745332    | 0.027907915    |
| BP              | regulation of keratinocyte proliferation                         | 37/18862       | 0.000773772    | 0.028299038    |
| BP              | regulation of chemotaxis                                         | 224/18862      | 0.000799698    | 0.028582522    |
| BP              | bone remodeling                                                  | 89/18862       | 0.000943054    | 0.03295725     |
| BP              | regulation of dopaminergic neuron differentiation                | 10/18862       | 0.001032363    | 0.035294066    |
| BP              | epithelial cell proliferation                                    | 428/18862      | 0.00116202     | 0.038038774    |
| BP              | regulation of dendritic cell antigen processing and presentation | 11/18862       | 0.001257775    | 0.038038774    |
| BP              | protein folding in endoplasmic reticulum                         | 11/18862       | 0.001257775    | 0.038038774    |
| BP              | skin morphogenesis                                               | 11/18862       | 0.001257775    | 0.038038774    |
| BP              | dendritic cell apoptotic process                                 | 11/18862       | 0.001257775    | 0.038038774    |
| BP              | regulation of dendritic cell apoptotic process                   | 11/18862       | 0.001257775    | 0.038038774    |
| BP              | endodermal cell differentiation                                  | 44/18862       | 0.001286801    | 0.038182347    |

|    |                                                                         |           |             |             |
|----|-------------------------------------------------------------------------|-----------|-------------|-------------|
| BP | brown fat cell differentiation                                          | 46/18862  | 0.001464569 | 0.04265236  |
| BP | establishment of T cell polarity                                        | 12/18862  | 0.001504544 | 0.043019868 |
| BP | regulation of cell adhesion mediated by integrin                        | 48/18862  | 0.001657031 | 0.04570258  |
| BP | tissue homeostasis                                                      | 260/18862 | 0.001717022 | 0.04570258  |
| BP | regulation of granulocyte chemotaxis                                    | 49/18862  | 0.001758907 | 0.04570258  |
| BP | establishment of lymphocyte polarity                                    | 13/18862  | 0.001772461 | 0.04570258  |
| BP | immunological synapse formation                                         | 13/18862  | 0.001772461 | 0.04570258  |
| BP | regulation of insulin secretion                                         | 178/18862 | 0.001794325 | 0.04570258  |
| BP | positive regulation of plasma membrane bounded cell projection assembly | 106/18862 | 0.001801795 | 0.04570258  |
| BP | regulation of bone remodeling                                           | 51/18862  | 0.001974208 | 0.049280987 |
| CC | integrin complex                                                        | 31/19520  | 1.38E-05    | 0.000958944 |
| CC | laminin complex                                                         | 12/19520  | 2.23E-05    | 0.000958944 |
| CC | protein complex involved in cell adhesion                               | 36/19520  | 2.53E-05    | 0.000958944 |
| CC | basement membrane                                                       | 94/19520  | 8.65E-05    | 0.002459337 |
| CC | basal part of cell                                                      | 258/19520 | 0.000233992 | 0.005320244 |
| CC | endoplasmic reticulum lumen                                             | 306/19520 | 0.000650914 | 0.012333107 |
| CC | basal plasma membrane                                                   | 240/19520 | 0.001014444 | 0.016475178 |
| CC | cornified envelope                                                      | 45/19520  | 0.001285224 | 0.016721371 |
| CC | anchored component of membrane                                          | 170/19520 | 0.001323775 | 0.016721371 |
| CC | neuronal dense core vesicle                                             | 13/19520  | 0.001692709 | 0.019243428 |
| CC | costamere                                                               | 18/19520  | 0.003269266 | 0.033787629 |
| CC | intermediate filament                                                   | 215/19520 | 0.00366975  | 0.034766056 |
| CC | cell-substrate junction                                                 | 423/19520 | 0.004089977 | 0.035766605 |
| CC | lamellipodium membrane                                                  | 22/19520  | 0.004875244 | 0.039588448 |
| CC | cortical actin cytoskeleton                                             | 78/19520  | 0.006154032 | 0.045305642 |
| CC | apical plasma membrane                                                  | 351/19520 | 0.006659117 | 0.045305642 |
| CC | microvillus membrane                                                    | 26/19520  | 0.006774871 | 0.045305642 |
| CC | intermediate filament cytoskeleton                                      | 256/19520 | 0.007604382 | 0.046857122 |
| CC | dense core granule                                                      | 28/19520  | 0.007831213 | 0.046857122 |
| CC | cell-cell junction                                                      | 485/19520 | 0.008465165 | 0.04811778  |

**Supplementary Table 5B. KEGG enrichment analysis.**

| ID       | Description                                     | BgRatio  | p value     | q value     |
|----------|-------------------------------------------------|----------|-------------|-------------|
| hsa04512 | ECM-receptor interaction                        | 88/8105  | 3.28E-07    | 3.11E-05    |
| hsa04510 | Focal adhesion                                  | 201/8105 | 8.56E-06    | 0.000370605 |
| hsa04151 | PI3K-Akt signaling pathway                      | 354/8105 | 1.17E-05    | 0.000370605 |
| hsa05222 | Small cell lung cancer                          | 92/8105  | 0.00011567  | 0.002739557 |
| hsa05412 | Arrhythmogenic right ventricular cardiomyopathy | 77/8105  | 0.000701775 | 0.01329678  |
| hsa05410 | Hypertrophic cardiomyopathy                     | 90/8105  | 0.001260558 | 0.019074857 |
| hsa05414 | Dilated cardiomyopathy                          | 96/8105  | 0.001601543 | 0.019074857 |
| hsa05165 | Human papillomavirus infection                  | 331/8105 | 0.001610766 | 0.019074857 |

**Supplementary Table 6A. GSEA of high risk.**

| NAME                                                          | ES         | NES       | NOM <i>p</i> -val | FDR <i>q</i> -val |
|---------------------------------------------------------------|------------|-----------|-------------------|-------------------|
| KEGG_PENTOSE_PHOSPHATE_PATHWAY                                | 0.5729152  | 1.6310743 | 0.01953125        | 1                 |
| KEGG_PROTEASOME                                               | 0.6784165  | 1.6303458 | 0.049701788       | 0.6821798         |
| KEGG_GLYCOSPHINGOLIPID_BIOSYNTHESIS_LACTO_AND_NEOLACTO_SERIES | 0.5090886  | 1.5907345 | 0.024952015       | 0.6408247         |
| KEGG_THYROID_CANCER                                           | 0.53489053 | 1.5439887 | 0.05179283        | 0.6907832         |
| KEGG_P53_SIGNALING_PATHWAY                                    | 0.47881857 | 1.5324117 | 0.04347826        | 0.60003185        |
| KEGG_GLYCOLYSIS_GLUconeogenesis                               | 0.47841245 | 1.5322174 | 0.037698414       | 0.50075066        |
| KEGG_ADHERENS_JUNCTION                                        | 0.4795818  | 1.5175084 | 0.0662768         | 0.47806197        |
| KEGG_STEROID_BIOSYNTHESIS                                     | 0.6314558  | 1.4914162 | 0.09486166        | 0.4986435         |
| KEGG_PATHOGENIC_ESCHERICHIA_COLI_INFECTION                    | 0.48299125 | 1.4645706 | 0.086105675       | 0.524178          |
| KEGG_TIGHT_JUNCTION                                           | 0.39693546 | 1.4420464 | 0.063872255       | 0.54062873        |
| KEGG_AMINOACYL_TRNA_BIOSYNTHESIS                              | 0.5580433  | 1.4407    | 0.11516315        | 0.49625063        |
| KEGG_STARCH_AND_SUCROSE_METABOLISM                            | 0.46116272 | 1.4073405 | 0.08583691        | 0.5482185         |
| KEGG_GALACTOSE_METABOLISM                                     | 0.48794708 | 1.3951346 | 0.091617934       | 0.53853256        |
| KEGG_CELL_CYCLE                                               | 0.4647909  | 1.3540881 | 0.19960861        | 0.61424387        |
| KEGG_AXON_GUIDANCE                                            | 0.3714874  | 1.3263278 | 0.10852713        | 0.6551905         |
| KEGG_BASE_EXCISION_REPAIR                                     | 0.5224427  | 1.3245112 | 0.1809145         | 0.6192906         |
| KEGG_O_GLYCAN_BIOSYNTHESIS                                    | 0.45017973 | 1.321248  | 0.1764706         | 0.5923887         |
| KEGG_PORPHYRIN_AND_CHLOROPHYLL_METABOLISM                     | 0.42830938 | 1.3130741 | 0.13465346        | 0.5810344         |
| KEGG_GLYCOSAMINOGLYCAN_BIOSYNTHESIS_KERATAN_SULFATE           | 0.48650512 | 1.3112824 | 0.13765182        | 0.55493397        |
| KEGG_PENTOSE_AND_GLUcURONATE_INTERCONVERSIONS                 | 0.46371907 | 1.2722654 | 0.18218623        | 0.62946343        |
| KEGG_BLADDER_CANCER                                           | 0.39896894 | 1.256486  | 0.18992248        | 0.6436727         |
| KEGG_REGULATION_OF_ACTIN_CYTOSKELETON                         | 0.33413285 | 1.250563  | 0.17105263        | 0.62979627        |
| KEGG_PANCREATIC_CANCER                                        | 0.39570457 | 1.2432532 | 0.22896282        | 0.6211923         |
| KEGG_PATHWAYS_IN_CANCER                                       | 0.33537713 | 1.2430347 | 0.17017208        | 0.59580684        |
| KEGG_DRUG_METABOLISM_OTHER_ENZYMES                            | 0.40908697 | 1.2375876 | 0.1609658         | 0.58401114        |
| KEGG_SMALL_CELL_LUNG_CANCER                                   | 0.3896531  | 1.2231851 | 0.22178218        | 0.59402245        |
| KEGG_ENDOCYTOSIS                                              | 0.3299927  | 1.2194865 | 0.20610687        | 0.58074325        |
| KEGG_ONE_CARBON_POOL_BY_FOLATE                                | 0.47091427 | 1.2165351 | 0.256167          | 0.5663879         |
| KEGG_AMINO_SUGAR_AND_NUCLEOTIDE_SUGAR_METABOLISM              | 0.4007442  | 1.2126254 | 0.23745173        | 0.55516595        |
| KEGG_N_GLYCAN_BIOSYNTHESIS                                    | 0.40781587 | 1.2106607 | 0.23287672        | 0.5410943         |
| KEGG_ASCORBATE_AND_ALDARATE_METABOLISM                        | 0.45372823 | 1.2069958 | 0.2371134         | 0.530202          |
| KEGG_DNA_REPLICATION                                          | 0.50567645 | 1.1796668 | 0.35166994        | 0.56995404        |
| KEGG_OOCYTE_MEIOSIS                                           | 0.36010596 | 1.1793286 | 0.26061776        | 0.55347526        |
| KEGG_SYSTEMIC_LUPUS_ERYTHEMATOSUS                             | 0.37165263 | 1.1768961 | 0.25851703        | 0.54163045        |
| KEGG_FRUCTOSE_AND_MANNOSE_METABOLISM                          | 0.39953077 | 1.1730746 | 0.29766536        | 0.53443813        |
| KEGG_ARRHYTHMOGENIC_RIGHT_VENTRICULAR_CARDIOMYOPATHY_ARVC     | 0.35322598 | 1.1730168 | 0.26061776        | 0.5197308         |
| KEGG_FOCAL_ADHESION                                           | 0.34690592 | 1.1704245 | 0.2751938         | 0.51039374        |
| KEGG_MISMATCH_REPAIR                                          | 0.4998743  | 1.1677153 | 0.3300199         | 0.50204176        |
| KEGG_NOTCH_SIGNALING_PATHWAY                                  | 0.35844958 | 1.1651915 | 0.25581396        | 0.49362785        |
| KEGG_ECM_RECEPTOR_INTERACTION                                 | 0.38675836 | 1.1465491 | 0.3151751         | 0.51444507        |
| KEGG_PYRIMIDINE_METABOLISM                                    | 0.35571525 | 1.1058619 | 0.34740883        | 0.5765829         |
| KEGG_STEROID_HORMONE_BIOSYNTHESIS                             | 0.33638063 | 1.0779973 | 0.34631148        | 0.6170261         |
| KEGG_BIOSYNTHESIS_OF_UNSATURATED_FATTY_ACIDS                  | 0.39363536 | 1.0769395 | 0.35416666        | 0.60520357        |
| KEGG_ENDOMETRIAL_CANCER                                       | 0.3395971  | 1.0718687 | 0.40151516        | 0.60124856        |
| KEGG_GLUTATHIONE_METABOLISM                                   | 0.32758725 | 1.0697683 | 0.35              | 0.5916402         |
| KEGG_HOMOLOGOUS_RECOMBINATION                                 | 0.42976084 | 1.0597887 | 0.44646466        | 0.59751785        |
| KEGG_BASAL_CELL_CARCINOMA                                     | 0.32655776 | 1.0506406 | 0.38491297        | 0.6011576         |
| KEGG_CHRONIC_MYELOID_LEUKEMIA                                 | 0.33301565 | 1.0484524 | 0.4165067         | 0.5925686         |
| KEGG_WNT_SIGNALING_PATHWAY                                    | 0.2844261  | 1.0387905 | 0.39961758        | 0.598086          |
| KEGG_NUCLEOTIDE_EXCISION_REPAIR                               | 0.37913045 | 1.0309824 | 0.44656488        | 0.60022134        |
| KEGG_RENAL_CELL_CARCINOMA                                     | 0.3186963  | 1.0266781 | 0.41917294        | 0.59651726        |
| KEGG_SPLICEOSOME                                              | 0.36476433 | 1.0200957 | 0.4743833         | 0.5970973         |

|                                                   |            |            |            |            |
|---------------------------------------------------|------------|------------|------------|------------|
| KEGG_PROSTATE_CANCER                              | 0.30396676 | 1.0045717  | 0.433526   | 0.6138756  |
| KEGG_METABOLISM_OF_XENOBIOTICS_BY_CYTOCHROME_P450 | 0.31419396 | 0.9750271  | 0.4947589  | 0.6572137  |
| KEGG_UBIQUITIN_MEDIATED_PROTEOLYSIS               | 0.30457303 | 0.9725739  | 0.4952199  | 0.6495022  |
| KEGG_APOPTOSIS                                    | 0.30550128 | 0.9666593  | 0.5116279  | 0.6480138  |
| KEGG_HYPERTROPHIC_CARDIOMYOPATHY_HCM              | 0.2806289  | 0.9614698  | 0.5190381  | 0.6459331  |
| KEGG_VEGF_SIGNALING_PATHWAY                       | 0.27282158 | 0.9604114  | 0.5095785  | 0.63673884 |
| KEGG_RNA_DEGRADATION                              | 0.3311516  | 0.95151705 | 0.54285717 | 0.641828   |
| KEGG_ALZHEIMERS_DISEASE                           | 0.30191407 | 0.9506232  | 0.5248509  | 0.632659   |
| KEGG_RETINOL_METABOLISM                           | 0.3078011  | 0.93862295 | 0.53503186 | 0.6427308  |
| KEGG_ETHER_LIPID_METABOLISM                       | 0.2848933  | 0.92489564 | 0.5694165  | 0.65457636 |
| KEGG_MELANOMA                                     | 0.25767887 | 0.9193458  | 0.5755814  | 0.65356475 |
| KEGG_COLORECTAL_CANCER                            | 0.28481606 | 0.9170352  | 0.54990584 | 0.64734876 |
| KEGG_CYSTEINE_AND_METHIONINE_METABOLISM           | 0.2772554  | 0.91319263 | 0.5952849  | 0.6442672  |
| KEGG_PROTEIN_EXPORT                               | 0.3686309  | 0.89727354 | 0.59029126 | 0.65978324 |
| KEGG_DRUG_METABOLISM_CYTOCHROME_P450              | 0.27977046 | 0.895435   | 0.61349696 | 0.65332603 |
| KEGG_TERPENOID_BACKBONE_BIOSYNTHESIS              | 0.37947118 | 0.88096434 | 0.59100205 | 0.6673157  |
| KEGG_LONG_TERM_POTENTIATION                       | 0.265575   | 0.87706816 | 0.6404715  | 0.66389406 |
| KEGG_ARGININE_AND_PROLINE_METABOLISM              | 0.25249606 | 0.8637797  | 0.6546906  | 0.67669934 |
| KEGG_BASAL_TRANSCRIPTION_FACTORS                  | 0.28742987 | 0.8605561  | 0.62081784 | 0.67225385 |
| KEGG_CITRATE_CYCLE_TCA_CYCLE                      | 0.33972847 | 0.8536729  | 0.60240966 | 0.67510945 |
| KEGG_NOD_LIKE_RECEPTOR_SIGNALING_PATHWAY          | 0.27057242 | 0.8370338  | 0.6673077  | 0.6935009  |
| KEGG_NITROGEN_METABOLISM                          | 0.27890974 | 0.82567173 | 0.75390625 | 0.70317525 |
| KEGG_DORSO_VENTRAL_AXIS_FORMATION                 | 0.28094056 | 0.8064852  | 0.73410404 | 0.72584325 |
| KEGG_TGF_BETA_SIGNALING_PATHWAY                   | 0.24235316 | 0.7868584  | 0.71881187 | 0.7473405  |
| KEGG_HUNTINGTONS_DISEASE                          | 0.24811034 | 0.77978605 | 0.6855469  | 0.7484468  |
| KEGG_PEROXISOME                                   | 0.23973116 | 0.75253385 | 0.7090559  | 0.7813006  |
| KEGG_LINOLEIC_ACID_METABOLISM                     | 0.24497381 | 0.6923127  | 0.8792757  | 0.8565561  |
| KEGG_ANTIGEN_PROCESSING_AND_PRESENTATION          | 0.23718034 | 0.6906942  | 0.814      | 0.84799135 |
| KEGG_OXIDATIVE_PHOSPHORYLATION                    | 0.16179605 | 0.4302852  | 0.9700599  | 0.9947666  |

### Supplementary Table 6B. GSEA of low risk.

| NAME                                               | ES          | NES        | NOM <i>p</i> -val | FDR <i>q</i> -val |
|----------------------------------------------------|-------------|------------|-------------------|-------------------|
| KEGG_NEUROACTIVE_LIGAND_RECEPTOR_INTERACTION       | -0.5290096  | -1.890673  | 0                 | 0.07818665        |
| KEGG_TYPE_II_DIABETES_MELLITUS                     | -0.53263277 | -1.7101595 | 0.003976143       | 0.41124317        |
| KEGG_CALCIIUM_SIGNALING_PATHWAY                    | -0.47805348 | -1.7010419 | 0                 | 0.3046739         |
| KEGG_TRYPTOPHAN_METABOLISM                         | -0.5109064  | -1.611668  | 0.0125            | 0.49959582        |
| KEGG_GLYCINE_SERINE_AND_THREONINE_METABOLISM       | -0.5354933  | -1.5545669 | 0.045009784       | 0.6258049         |
| KEGG_VASCULAR_SMOOTH_MUSCLE_CONTRACTION            | -0.45131353 | -1.5381501 | 0.033970278       | 0.5840838         |
| KEGG_TASTE_TRANSDUCTION                            | -0.47686335 | -1.5074612 | 0.050632913       | 0.61628556        |
| KEGG_HEMATOPOIETIC_CELL_LINEAGE                    | -0.5428187  | -1.4974189 | 0.08730159        | 0.57271385        |
| KEGG_PRIMARY_IMMUNODEFICIENCY                      | -0.6386303  | -1.4330411 | 0.18431373        | 0.75888455        |
| KEGG_JAK_STAT_SIGNALING_PATHWAY                    | -0.43019027 | -1.4310992 | 0.103658535       | 0.69109493        |
| KEGG_ABC_TRANSPORTERS                              | -0.44498968 | -1.4232751 | 0.06841046        | 0.65386295        |
| KEGG_ADIPOCYTOKINE_SIGNALING_PATHWAY               | -0.4124259  | -1.4004673 | 0.07692308        | 0.6760876         |
| KEGG_PHOSPHATIDYLINOSITOL_SIGNALING_SYSTEM         | -0.43768927 | -1.3972843 | 0.09850107        | 0.634523          |
| KEGG_GLYCOSPHINGOLIPID_BIOSYNTHESIS_GANGLIO_SERIES | -0.54259735 | -1.3912437 | 0.10261569        | 0.6088296         |
| KEGG_INTESTINAL_IMMUNE_NETWORK_FOR_IGA_PRODUCTION  | -0.5721416  | -1.3898985 | 0.17773438        | 0.5723439         |
| KEGG_MATURITY_ONSET_DIABETES_OF_THE_YOUNG          | -0.55656147 | -1.3844813 | 0.14003944        | 0.5516851         |
| KEGG_CHEMOKINE_SIGNALING_PATHWAY                   | -0.4294434  | -1.3836561 | 0.12704918        | 0.52157277        |
| KEGG_ASTHMA                                        | -0.5758721  | -1.382636  | 0.17153996        | 0.49566385        |
| KEGG_CELL_ADHESION_MOLECULES_CAMS                  | -0.43577835 | -1.362344  | 0.17540322        | 0.5201028         |
| KEGG_CYTOKINE_CYTOKINE_RECEPTOR_INTERACTION        | -0.40754113 | -1.3578213 | 0.12525667        | 0.5050087         |
| KEGG_MTOR_SIGNALING_PATHWAY                        | -0.42019013 | -1.3523698 | 0.106471814       | 0.49395788        |
| KEGG_REGULATION_OF_AUTOPHAGY                       | -0.42233485 | -1.3461435 | 0.10816327        | 0.48515308        |
| KEGG_TYROSINE_METABOLISM                           | -0.42170665 | -1.341936  | 0.10766046        | 0.47379693        |

|                                                                  |             |             |            |            |
|------------------------------------------------------------------|-------------|-------------|------------|------------|
| KEGG_GLYCOSAMINOGLYCAN_DEGRADATION                               | -0.48054728 | -1.3278168  | 0.15605749 | 0.48577037 |
| KEGG_FC_EPSILON_RI_SIGNALING_PATHWAY                             | -0.39328453 | -1.3148739  | 0.15212981 | 0.4949966  |
| KEGG_PPAR_SIGNALING_PATHWAY                                      | -0.38816133 | -1.297917   | 0.1399177  | 0.51296306 |
| KEGG_LONG_TERM_DEPRESSION                                        | -0.36285532 | -1.2761356  | 0.13279678 | 0.5412     |
| KEGG_COMPLEMENT_AND_COAGULATION_CASCADES                         | -0.3989361  | -1.263181   | 0.16384181 | 0.5521064  |
| KEGG_TYPE_I_DIABETES_MELLITUS                                    | -0.4928752  | -1.2604029  | 0.26732674 | 0.53883076 |
| KEGG_PROXIMAL_TUBULE_BICARBONATE_RECLAMATION                     | -0.44412115 | -1.2592758  | 0.18590999 | 0.522951   |
| KEGG_PRIMARY_BILE_ACID_BIOSYNTHESIS                              | -0.49527532 | -1.2533015  | 0.18442623 | 0.51886904 |
| KEGG_GNRH_SIGNALING_PATHWAY                                      | -0.34357572 | -1.2519171  | 0.14784394 | 0.50569147 |
| KEGG_INOSITOL_PHOSPHATE_METABOLISM                               | -0.39771664 | -1.2419469  | 0.21920668 | 0.51269734 |
| KEGG_MAPK_SIGNALING_PATHWAY                                      | -0.32389942 | -1.2344974  | 0.1764706  | 0.51308984 |
| KEGG_ALDOSTERONE_REGULATED_SODIUM_REABSORPTION                   | -0.3750422  | -1.22868    | 0.16359918 | 0.5105368  |
| KEGG_T_CELL_RECEPTOR_SIGNALING_PATHWAY                           | -0.411573   | -1.2120905  | 0.28456914 | 0.5295486  |
| KEGG_GLYCOSAMINOGLYCAN_BIOSYNTHESIS_CHONDROITIN_SULFATE          | -0.45656192 | -1.206142   | 0.2774451  | 0.52710754 |
| KEGG_NICOTINATE_AND_NICOTINAMIDE_METABOLISM                      | -0.38467285 | -1.2003758  | 0.23868313 | 0.52426314 |
| KEGG_AUTOIMMUNE_THYROID_DISEASE                                  | -0.43872103 | -1.1698861  | 0.31547618 | 0.57136863 |
| KEGG_MELANOGENESIS                                               | -0.3255055  | -1.1616304  | 0.23982869 | 0.57462007 |
| KEGG_ALLOGRAFT_REJECTION                                         | -0.5078549  | -1.158935   | 0.36399218 | 0.56604004 |
| KEGG_GAP_JUNCTION                                                | -0.3317633  | -1.1554563  | 0.26283368 | 0.55955046 |
| KEGG_FATTY_ACID_METABOLISM                                       | -0.40320912 | -1.1531155  | 0.29012346 | 0.5516308  |
| KEGG_SELENOAMINO_ACID_METABOLISM                                 | -0.37339255 | -1.1386981  | 0.30241936 | 0.56841093 |
| KEGG_BETA_ALANINE_METABOLISM                                     | -0.39741    | -1.1361926  | 0.28252032 | 0.5608648  |
| KEGG_GLYCEROPHOSPHOLIPID_METABOLISM                              | -0.31059223 | -1.1272689  | 0.26612905 | 0.56516355 |
| KEGG_OLFACTORY_TRANSDUCTION                                      | -0.24886155 | -1.115168   | 0.22376238 | 0.57648504 |
| KEGG_PRION_DISEASES                                              | -0.36823776 | -1.1127352  | 0.3093385  | 0.56920344 |
| KEGG_INSULIN_SIGNALING_PATHWAY                                   | -0.3109605  | -1.1121604  | 0.3268817  | 0.5585135  |
| KEGG_BUTANOATE_METABOLISM                                        | -0.37009233 | -1.0814086  | 0.36491936 | 0.6072234  |
| KEGG_PANTOTHENATE_AND_COA_BIOSYNTHESIS                           | -0.37421823 | -1.0770823  | 0.3530572  | 0.6036107  |
| KEGG_CARDIAC_MUSCLE_CONTRACTION                                  | -0.32574925 | -1.0768429  | 0.371134   | 0.5923154  |
| KEGG_PROGESTERONE_MEDIATED_OOCYTE_MATURATION                     | -0.32766244 | -1.0730956  | 0.36247334 | 0.588726   |
| KEGG_VALINE_LEUCINE_AND_ISOLEUCINE_DEGRADATION                   | -0.37054572 | -1.0679052  | 0.37623763 | 0.5874844  |
| KEGG_DILATED_CARDIOMYOPATHY                                      | -0.31053647 | -1.0668976  | 0.34879032 | 0.5784172  |
| KEGG_EPITHELIAL_CELL_SIGNALING_IN_HELICOBACTER_PYLORI_INFECTIION | -0.31845626 | -1.0656122  | 0.36916837 | 0.5703242  |
| KEGG_GRAFT_VERSUS_HOST_DISEASE                                   | -0.4773792  | -1.0647981  | 0.42629483 | 0.56208354 |
| KEGG_LYSINE_DEGRADATION                                          | -0.3400369  | -1.0595781  | 0.39591837 | 0.5619305  |
| KEGG_FC_GAMMA_R_MEDIATED_PHAGOCYTOSIS                            | -0.32370082 | -1.056988   | 0.3877551  | 0.55720764 |
| KEGG_GLYCOSAMINOGLYCAN_BIOSYNTHESIS_HEPARAN_SULFATE              | -0.36602896 | -1.0548011  | 0.37708333 | 0.5525173  |
| KEGG_ARACHIDONIC_ACID_METABOLISM                                 | -0.30121955 | -1.0340339  | 0.39314517 | 0.57759076 |
| KEGG_RIBOFLAVIN_METABOLISM                                       | -0.3628063  | -1.0269295  | 0.41041666 | 0.581104   |
| KEGG_B_CELL_RECEPTOR_SIGNALING_PATHWAY                           | -0.35677096 | -1.0201818  | 0.45039684 | 0.5839937  |
| KEGG_PHENYLALANINE_METABOLISM                                    | -0.3458501  | -1.0084561  | 0.44855967 | 0.59530926 |
| KEGG_RENIN_ANGIOTENSIN_SYSTEM                                    | -0.39185286 | -0.9946408  | 0.48336595 | 0.61027443 |
| KEGG_HISTIDINE_METABOLISM                                        | -0.32132426 | -0.9890151  | 0.48033127 | 0.6116145  |
| KEGG_LYSOSOME                                                    | -0.30735183 | -0.9859231  | 0.4526316  | 0.6080056  |
| KEGG_VIBRIO_CHOLERAE_INFECTIION                                  | -0.2991553  | -0.9856829  | 0.4556701  | 0.59937316 |
| KEGG_PURINE_METABOLISM                                           | -0.271922   | -0.98382556 | 0.46637744 | 0.5934177  |
| KEGG_RNA_POLYMERASE                                              | -0.34659335 | -0.95722973 | 0.50988144 | 0.6307953  |
| KEGG_NEUROTROPHIN_SIGNALING_PATHWAY                              | -0.27906525 | -0.92767113 | 0.56959313 | 0.67536575 |
| KEGG_ACUTE_MYELOID_LEUKEMIA                                      | -0.30859992 | -0.92660505 | 0.54037267 | 0.66776955 |
| KEGG_AMYOTROPHIC_LATERAL_SCLEROSIS_ALS                           | -0.27340278 | -0.92612875 | 0.5708419  | 0.6596064  |
| KEGG_NON_SMALL_CELL_LUNG_CANCER                                  | -0.30022708 | -0.92514    | 0.55737704 | 0.65228117 |
| KEGG_LEUKOCYTE_TRANSENDOTHELIAL_MIGRATION                        | -0.27998474 | -0.9202179  | 0.5386266  | 0.6523266  |
| KEGG_ERBB_SIGNALING_PATHWAY                                      | -0.26887137 | -0.91797024 | 0.5744235  | 0.6477343  |
| KEGG_HEDGEHOG_SIGNALING_PATHWAY                                  | -0.28201923 | -0.9156276  | 0.55737704 | 0.64300805 |
| KEGG_NATURAL_KILLER_CELL_MEDIATED_CYTOTOXICITY                   | -0.28414455 | -0.90748185 | 0.54969573 | 0.6490106  |
| KEGG_SPHINGOLIPID_METABOLISM                                     | -0.29363042 | -0.9023531  | 0.60162604 | 0.6489709  |

|                                                           |             |             |            |            |
|-----------------------------------------------------------|-------------|-------------|------------|------------|
| KEGG_PROANOATE_METABOLISM                                 | -0.3202926  | -0.8933692  | 0.59356135 | 0.6564102  |
| KEGG_GLIOMA                                               | -0.26588964 | -0.87776834 | 0.6012397  | 0.67394316 |
| KEGG_GLYCEROLIPID_METABOLISM                              | -0.25562853 | -0.87741315 | 0.645749   | 0.66659164 |
| KEGG_OTHER_GLYCAN_DEGRADATION                             | -0.3497702  | -0.8746694  | 0.5978947  | 0.6635369  |
| KEGG_LEISHMANIA_INFECTION                                 | -0.31960237 | -0.8571332  | 0.6122449  | 0.6853992  |
| KEGG_ALANINE_ASPARTATE_AND_GLUTAMATE_METABOLISM           | -0.26438203 | -0.8277334  | 0.71398747 | 0.72542256 |
| KEGG_VIRAL_MYOCARDITIS                                    | -0.27853227 | -0.82128996 | 0.62890625 | 0.7271384  |
| KEGG_TOLL_LIKE_RECEPTOR_SIGNALING_PATHWAY                 | -0.25039133 | -0.80701625 | 0.66935486 | 0.7418337  |
| KEGG_RIG_I_LIKE_RECEPTOR_SIGNALING_PATHWAY                | -0.24272378 | -0.7962348  | 0.71666664 | 0.7515454  |
| KEGG_VASOPRESSIN_REGULATED_WATER_REABSORPTION             | -0.257244   | -0.7952852  | 0.7171717  | 0.7445486  |
| KEGG_SNARE_INTERACTIONS_IN_VESICULAR_TRANSPORT            | -0.26335508 | -0.79454243 | 0.71369296 | 0.7376034  |
| KEGG_PYRUVATE_METABOLISM                                  | -0.25223786 | -0.79080826 | 0.73140496 | 0.7351275  |
| KEGG_GLYCOSYLPHOSPHATIDYLINOSITOL_GPI_ANCHOR_BIOSYNTHESIS | -0.29210636 | -0.7644893  | 0.72938687 | 0.76874876 |
| KEGG_ALPHA_LINOLENIC_ACID_METABOLISM                      | -0.2534912  | -0.7415896  | 0.87829614 | 0.79504913 |
| KEGG_GLYOXYLATE_AND_DICARBOXYLATE_METABOLISM              | -0.29077378 | -0.7335219  | 0.78644764 | 0.79881746 |
| KEGG_CYTOSOLIC_DNA_SENSING_PATHWAY                        | -0.23144941 | -0.7221297  | 0.8114754  | 0.80624986 |
| KEGG_RIBOSOME                                             | -0.3269558  | -0.6639908  | 0.7683168  | 0.8751104  |
| KEGG_PARKINSONS_DISEASE                                   | -0.18312952 | -0.5185772  | 0.92785573 | 0.9770979  |

---
